# Supplementary material for: Modelling catalytic turnover frequencies in ionic liquids: the determination of the bimolecular rate constant for solvent displacement from [(C6H6)Cr(CO)2Solv] in 1-n-butyl-3-methylimidazolium hexafluorophosphateElectronic supplementary information (ESI) available: synthesis of RTILs. See http://www.rsc.org/suppdata/cc/b3/b315781d/
Source: Royal Society of Chemistry journal article supplement (doi:10.1039/b315781d), 2004-01-01
Supplement: b315781d.doc [file b315781d.doc]

## Preparation of “spectroscopic grade” ionic liquids

If ionic liquids are to be used for spectroscopic investigations, it is important that they can be prepared in a form that is sufficiently pure. We have developed preparative methods that can be used to generate reliably colourless “spectroscopic grade” ionic liquids. The precautions can be summarized into four sections, as expanded on below. The methods are discussed for the preparation of 1,3-dialkylimidazolium salts, but there is no apparent reason why they may not be used for any water-stable RTIL. Also, it may not always be necessary to employ all of the procedures, although following them should result in reliably colourless RTILs. Some of these procedures have been adapted from those reported by Welton *et al.*.[[1]](#endnote-2)

(i) *Purification of starting materials.* We would generally recommend the purification of organic starting materials following standard literature procedures.[[2]](#endnote-3) To this end, the alkyl halides are washed with sulfuric acid and then distilled prior to use, while the imidazoles are distilled. Purification of salts or acids used for anion exchange reactions is more problematic, and we have generally found this unnecessary.

(ii) *Control of conditions for quaternisation reactions.* Keeping the reaction oxygen free, and the temperature as low as possible decreases the chance of discolouration of the resulting halide salt. In order to achieve maximum conversion in a reasonable time, it is generally preferable to use bromoalkanes rather than chloroalkanes. The imidazole is first mixed with an excess of bromoalkane under a flow of dry nitrogen at room temperature. On stirring, the reaction should start spontaneously, and may be identified by the formation of a viscous lower layer and an increase in the temperature of the reaction. If necessary, gentle heating may be applied to initiate the reaction. Being exothermic, care must be taken to prevent the reaction from going out of control (which can result in discoloration of the final product), so at this stage the mixture is placed in an ice/water bath and allowed to stir overnight, maintaining the flow of nitrogen. This generally results in 80-90% conversion, after which the mixture is heated to 60-70 °C for 2-3 hours to take the reaction to completion. On cooling, the excess haloalkane is removed by decantation, and the mixture is then washed with dry ethyl acetate or toluene to remove remaining traces of starting material. The resulting halide salt is finally dried by heating at *ca*. 50 °C *in vacuo*. Care must be taken at this stage as overheating can result in breakdown and discolouration of the product. If desired, the halide salt may be further purified by recrystallisation from acetonitrile/ethyl acetate.

(iii) *Anion exchange.* The anion exchange step is usually less troublesome than the quaternisation reaction, although we have found that some sources of anion, particularly HPF6, can result in the formation of coloured products. For this reason, we generally now employ ammonium or lithium salts of the desired anion where possible. These have the added advantage of being less exothermic than the neutralization reaction. In the case of the water immiscible salts used in this study, the removal of lithium or ammonium bromide by-products is achieved simply by washing with water until the washing solutions display no bromide on testing with silver nitrate solution. If the free acid is used, testing the washings should be tested with pH paper until neutrality is achieved.

(iv) *Cleanup of end product.* Despite all our efforts, the liquids often still display some residual colour, so a final cleanup process has been developed. First, the liquid is mixed with a large quantity of activated charcoal and some acidic or neutral alumina. The mixture is then stirred for 24 hours at *ca*. 50 °C under a flow of nitrogen. The neat liquid is then filtered through kieselguhr. This process can be slow, particularly for more viscous RTILs such as those based on the [PF6]- anion, but we have found that addition of a co-solvent to reduce the speed up filtration can reintroduce impurities. In this manner we have been able to produce liquids with perfectly clear spectral windows down to  = 300 nm and below. One disadvantage of the charcoal/alumina cleanup method is that considerable amounts of product are lost, so it is recommended that this approach is used only on relatively large quantities of product.

Once prepared, the liquids were dried by heating *in vacuo* at 70 °C for up to 24 hours. This has been shown previously to reduce the water content down to *ca.* 6 x 10-3 M.[[3]](#endnote-4) After this step, the liquids should be stored under dry nitrogen or argon. It is also recommended that the liquids are dried immediately prior to use as even water-immiscible RTILs may absorb significant quantities of water on storage. It is particularly important that liquids based on the [PF6]- anion are carefully dried before storage as breakdown to HF occurs readily in the presence of even small quantities of water. If the technique is available, it is recommended that the water content of the liquid is quantified using Karl-Fisher titration.

For these experiments, no direct quantification of water content was carried out. The ionic liquid employed was always dried under vacuum at 70 °C for several hours before preparation of the samples. However, the experimental setup used meant that exposure to the atmosphere was inevitable, if only for a short period whilst filling the UV-visible cuvette of the laser flash photolysis apparatus. After filling, the sample was rigorously degassed with N2 for at least 5 minutes before data were recorded. As indicated in the main text of this paper, however, even with this very limited exposure to the air a significant concentration of water was taken up.

1. L. Cammarata, S.G. Kazarian, P.A. Salter, T. Welton, *Phys. Chem. Chem. Phys.*, 2001, **3**, 5192. [↑](#endnote-ref-2)
2. W.L.F. Armarego, D.D. Perrin, *The Purification of Laboratory Chemicals*, 4th ed., Butterworth-Heinemann, Oxford, 1997. [↑](#endnote-ref-3)
3. P. Wasserscheid, C.M. Gordon, C. Hilgers, M.J. Muldoon, I.R. Dunkin, *Chem. Commun.*, 2001, 1186. [↑](#endnote-ref-4)
